# Supplementary material for: Identification of plant vacuolar transporters mediating phosphate storage
Source: PubMed Central journal article supplement (PMC4821872; doi:10.1038/ncomms11095), 2016-03-31
Supplement: ncomms11095-s1.pdf [file ncomms11095-s1.pdf]

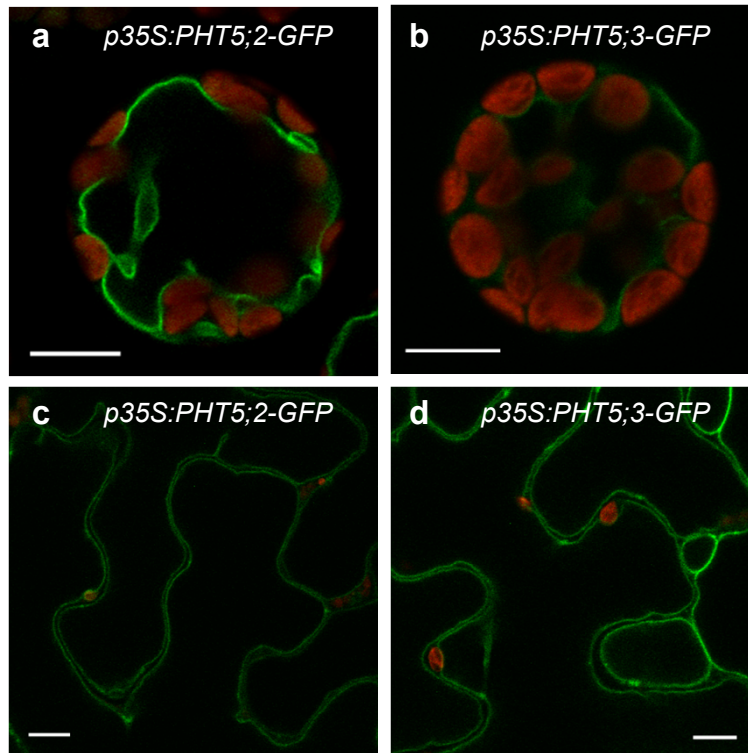

**Supplementary Figure 1 | Subcellular localization of *Arabidopsis* PHT5;2 and PHT5;3**

Expression of *p35S:AtPHT5;2-GFP* and *p35S:AtPHT5;3-GFP* in *Arabidopsis* mesophyll protoplasts (**a,b**) and tobacco (*Nicotiana benthamiana*) leaves (**c,d**). Scale bar, 10  $\mu$ m.

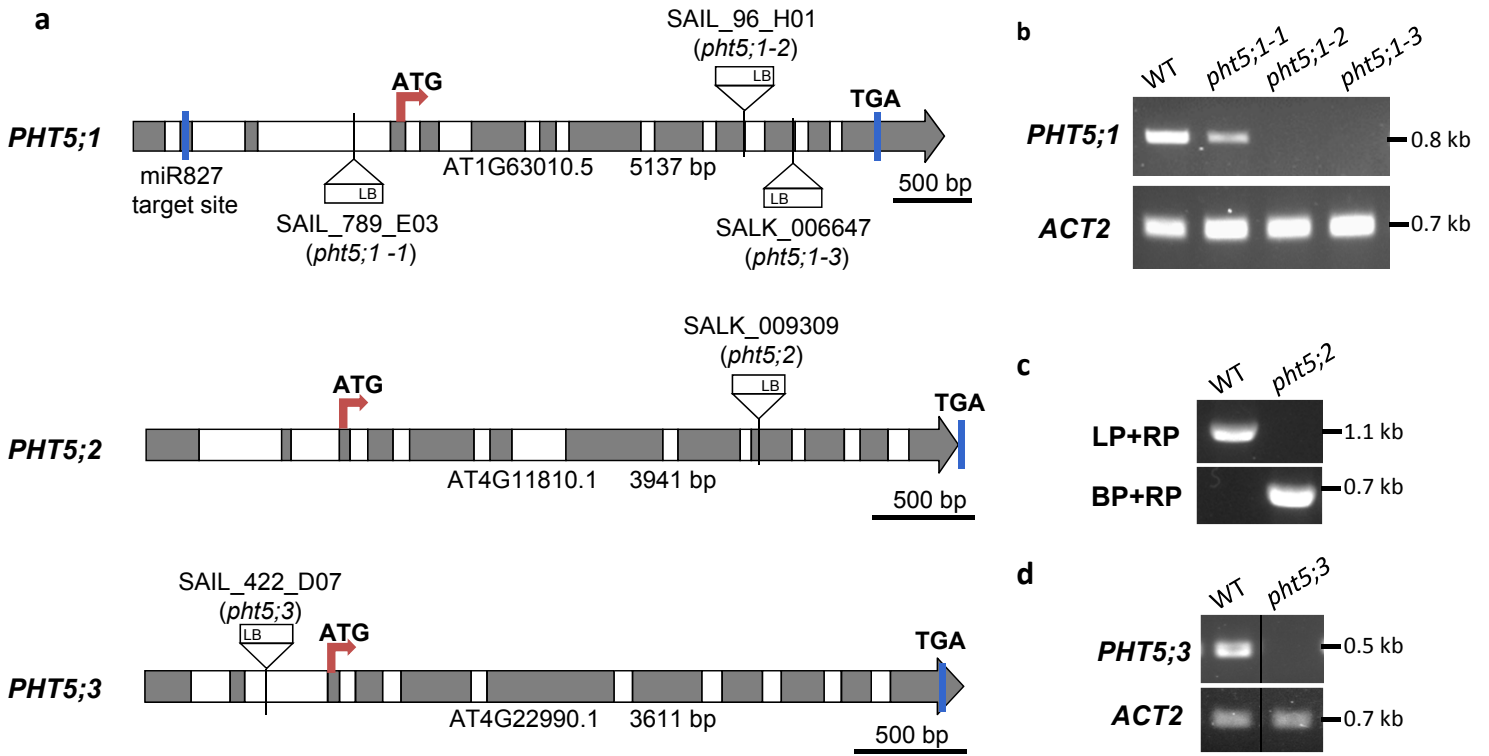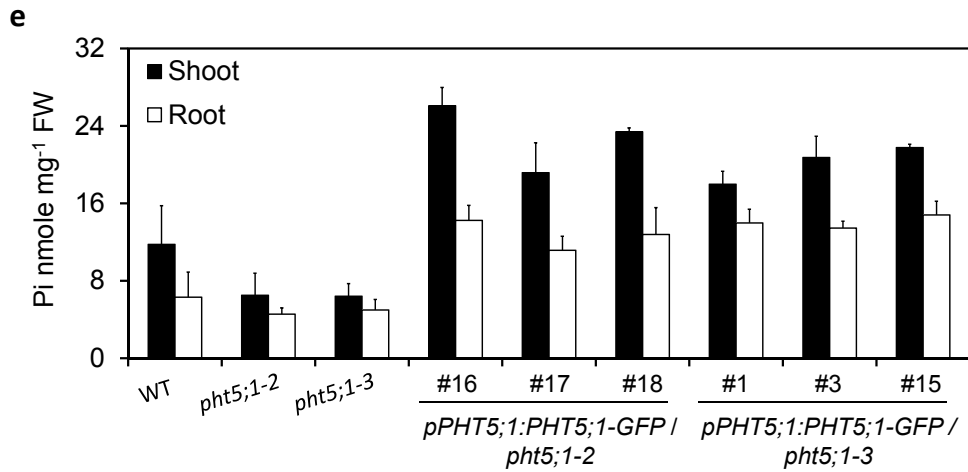

**Supplementary Figure 2 | Characterization and complementation of the mutants of the *PHT5s***

(a) Schematic representation of T-DNA insertion in the mutants of *PHT5s*.

(b,d) RT-PCR analyses of *PHT5;1* and *PHT5;3* transcripts in the respective mutants of *PHT5s*. (c) Because of extremely low expression of *PHT5;2*, PCR analysis of genomic DNA was employed to confirm homozygous T-DNA inserted mutation at *PHT5;2* locus (e)

Complementation of the *pht5;1-2* or *pht5;1-3* mutant by the expression of *PHT5;1-GFP* driven by its native promoter. Three independent transgenic lines in each mutant background are shown. Error bar, s.d. ( $n=3$ ).

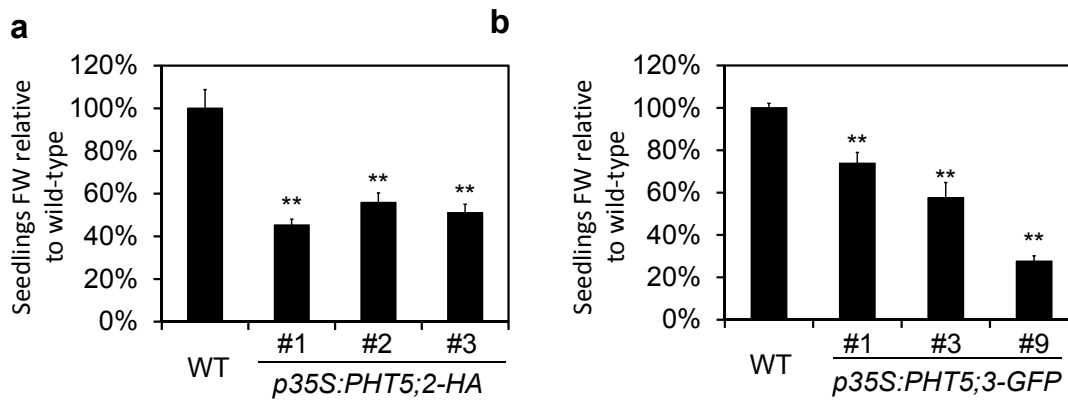

**Supplementary Figure 3 | Overexpression of *Arabidopsis* *PHT5;2* and *PHT5;3* leads to retarded growth**

The relative fresh weight of seedlings of *PHT5;2-HA*-overexpressing lines (11-day-old, **a**) and *PHT5;3-GFP*-overexpressing lines (12-day-old, **b**) to the corresponding wild-type plants (WT). Three independent transgenic lines are shown for each construct. Error bar, s.d. ( $n=3$ ), \* $P<0.05$ , \*\* $P<0.01$ , Student's *t*-test. Results were reproducible in at least three independent experiments.

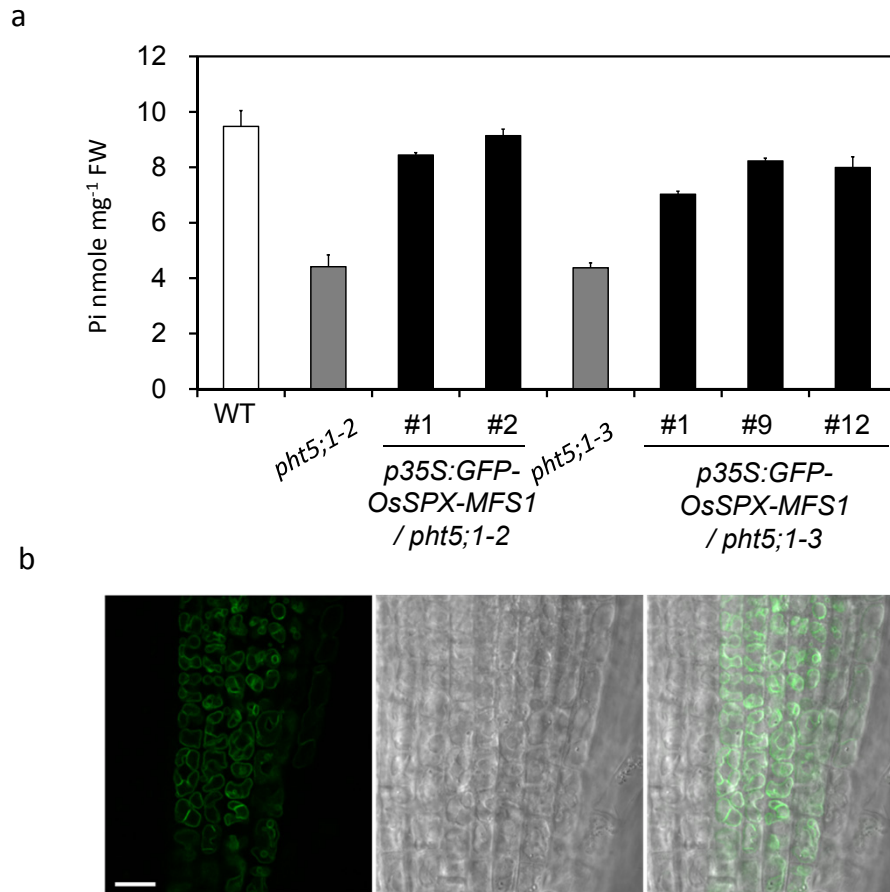

**Supplementary Figure 4 | Characterization of function and sub-cellular localization of OsSPX-MFS1 in *Arabidopsis***

**(a)** Pi concentrations of the first leaf of 14-day-old *Arabidopsis* wild type (WT), *pht5;1-2* and *pht5;1-3* plants and *p35S:GFP-OsSPX-MFS1*-overexpressing lines grown under +Pi conditions. Two-three independent transgenic lines in each mutant background are shown. Error bar, s.d., technique replicates  $n=2$ . **(b)** Fluorescence signal (left), bright field (middle) and merged image (right) of *pht5;1-3* mutant transformed with a *p35S:GFP-OsSPX-MFS1* construct. Scale bar, 10  $\mu\text{m}$

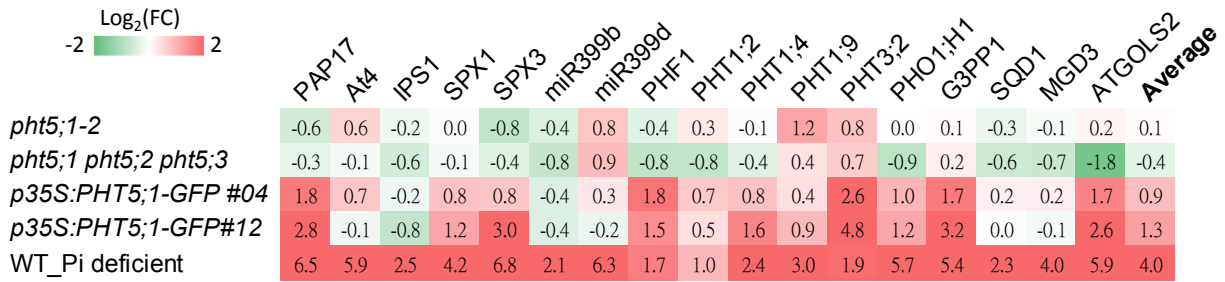

**Supplementary Figure 5 | Overexpression of *PHT5;1* leads to the upregulation of Pi starvation-induced genes under Pi-sufficient conditions.**

Heat map of qRT-PCR results reveals the upregulation of many Pi starvation-induced (PSi) genes in the shoot of 10-day-old *PHT5;1*-overexpressing lines, implying that a lower cyt-Pi level of the *PHT5;1*-overexpressing lines likely induced Pi-starvation responses. In contrast, these PSi genes were downregulated in the *pht5* triple mutants. The numbers indicate the log<sub>2</sub> values of fold changes of gene expression relative to WT plants grown under Pi sufficiency. Results were reproducible in three independent experiments.

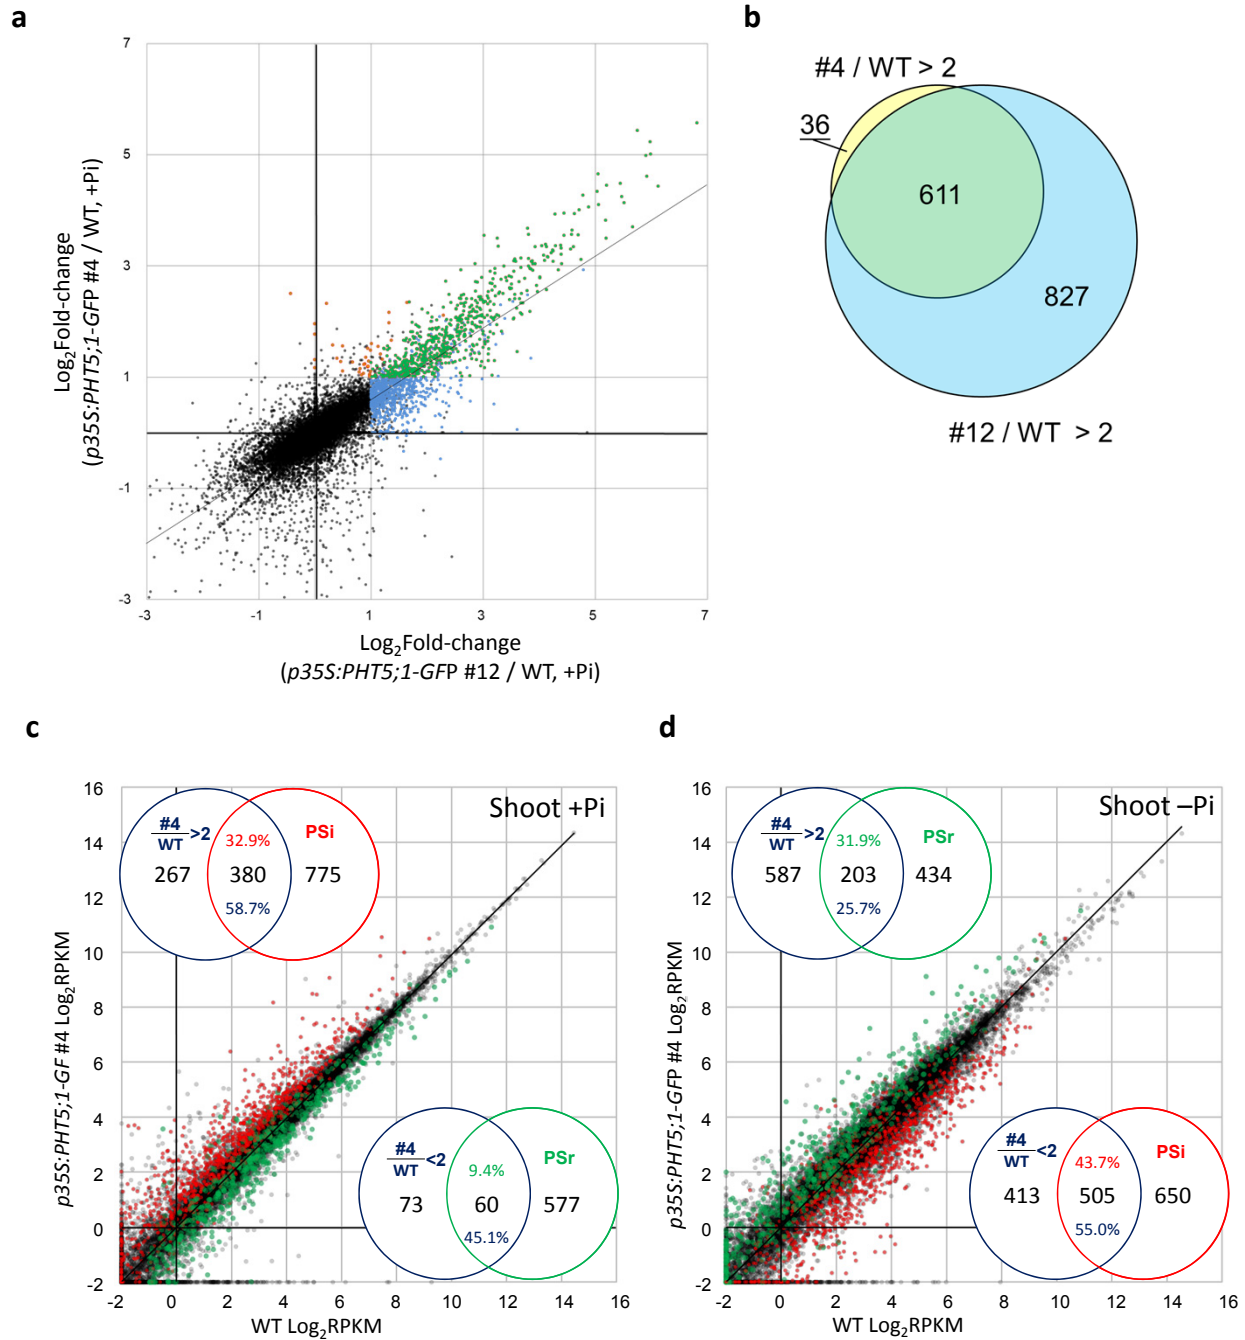

**Supplementary Figure 6 | Overexpression of *PHT5;1* leads to mis-regulation of PSR genes.**

(a) The positive correlation of the gene expression pattern between two *PHT5;1*-overexpression lines, #4 and #12, grown under Pi-sufficient conditions (Pearson coefficient of correlation  $r = 0.73$ ). (b) Venn diagram showing the overlap of differentially expressed genes in the *PHT5;1*-overexpressing lines #4 and #12.

Scatter plots showing the relationship of the expression of an individual gene (a single dot) in the shoots between WT and *PHT5;1* overexpressing plants (line #4) grown under Pi sufficient medium (c) or starvation for 3 days (d). The Pi-starvation-upregulated and -downregulated genes are marked in red and green, respectively. The Venn diagrams in each patterns indicate the proportion of upregulated or downregulated genes in *PHT5;1* overexpressing lines belonging to PSR genes of WT.

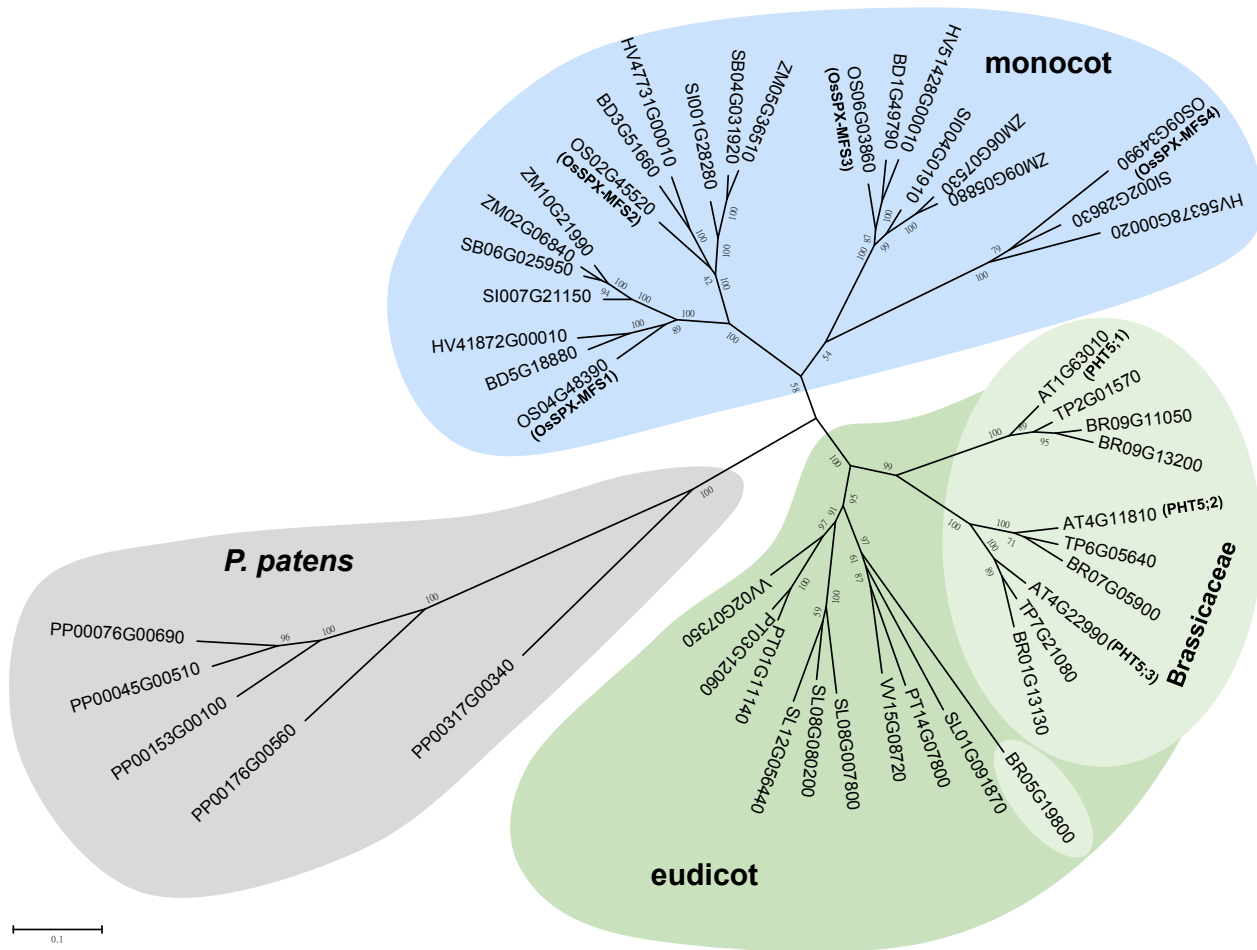

**Supplementary Figure 7 | Phylogenetic analysis of SPX-MFS homologs.**

The coding DNA sequences of 47 *SPX-MFS* homologs in 13 different species obtained from PLAZA 3.0 (<http://bioinformatics.psb.ugent.be/plaza/>) were aligned using ClustalW. The phylogenetic tree was built based on Maximum Likelihood with the Tamura-Nei model. The scale bar indicates genetic distance of branch length measured in the number of nucleotide substitutions per site. *Oryza sativa japonica* (OS), *Sorghum bicolor* (SB), *Zea mays* (ZM), *Setaria italic* (SI), *Brachypodium distachyon* (BD), *Hordeum vulgare* (HV), *Arabidopsis thaliana* (AT), *Brassica rapa* (BR), *Thellungiella parvula* (TP), *Populus trichocarpa* (PT), *Vitis vinifera* (VV), *Solanum lycopersicum* (SL) and *Physcomitrella patens* (PP).

**Supplementary Table 1 | List of primers**

| <b>Gene</b>     |         | <b>Sequences (5'→3')</b>       |
|-----------------|---------|--------------------------------|
| <b>Q-RT-PCR</b> |         |                                |
| AT1G63010       | Forward | TAACCAATCTACTTTGCCGGGAT        |
| <i>PHT5;1</i>   | Reverse | CTCTGAATGAAATGCATAGCCATAC      |
| AT4G22990       | Forward | GGATCGGCGAGAGCAGTGAA           |
| <i>PHT5;3</i>   | Reverse | CTTTAACGGTACACAGTCGCTTATAT     |
| AT4G05320       | Forward | GCCCTTGATAATCCCTGATGAATAAG     |
| <i>UBQ10</i>    | Reverse | AAAGAGATAACAGGAACGGAAACATAGT   |
| AT3G17790       | Forward | TTGTTGACACGACTCCTTTTCGT        |
| <i>PAP17</i>    | Reverse | ATCACGGAGAAGAGCTTTGACAT        |
| AT5G03545       | Forward | AACCCTAACACATCCATTGTTGAA       |
| <i>AT4</i>      | Reverse | GAAACTTGAACCTCTCAAACCCT        |
| AT3G09922       | Forward | TTTGGAGAATAGTCAGACCAGTGC       |
| <i>IPS1</i>     | Reverse | TCACTATAAAGAGAATCGGAAGCA       |
| AT5G20150       | Forward | GATTCCATTGTTGGAGCAAGA          |
| <i>SPX1</i>     | Reverse | AATCTGTTAGCTTCTTCTATTGTA       |
| AT2G45130       | Forward | CCGATCTCTTCATCTATCTT           |
| <i>SPX3</i>     | Reverse | TTACGATAATGTCATATTGCGT         |
| AT1G63005       | Forward | AGGTCCTTTACTTCCAAATATACACATACA |
| <i>MIR399B</i>  | Reverse | TCGATCATCGGAAATTTTCGA          |
| AT2G34202       | Forward | TTACTGGGCGAATACTCCTATGG        |
| <i>MIR399D</i>  | Reverse | ATTTTACTTGCATATCTAGCCAATGC     |
| AT3G52190       | Forward | GCCTTCTGAGGATCATAGTAG          |
| <i>PHF1</i>     | Reverse | CGCTGCAACAAGATAAGGAAG          |
| AT5G43370       | Forward | AGCCATCATTGGAGCCTTC            |
| <i>PHT1;2</i>   | Reverse | ACCTTAGCCTTGTCTTGATT           |
| AT2G38940       | Forward | GGTCCCAATAGTTTAGGTGAT          |
| <i>PHT1;4</i>   | Reverse | AGTTGCTAGAGACAAGGAGAA          |
| AT1G76430       | Forward | GAAGATCGTTAGAAGAGAACGAA        |
| <i>PHT1;9</i>   | Reverse | GTATTGTCTCCGAAGTAACTCA         |
| AT3G48850       | Forward | GCTCCATCTGTAAGTGCATA           |
| <i>PHT3;2</i>   | Reverse | CTGGTAGTTCTGTTTCCCTT           |
| AT1G68740       | Forward | GATGAAGAAGACTAATCTGATC         |
| <i>PHO1;H1</i>  | Reverse | GTTCTTTCAAATCTGACGAAGC         |
| AT3G47420       | Forward | AGGCGAATATTTATCGGACGAA         |
| <i>G3PP1</i>    | Reverse | ACACCTCCTACATCGAACATTGTC       |



| Gene                   |         | Sequences (5'→3')                   |
|------------------------|---------|-------------------------------------|
| AT4G33030              | Forward | CATTGACTCCTATTGCCTCCATT             |
| <i>SQD1</i>            | Reverse | TCCCTGTCAAAGCCTTCCAT                |
| AT2G11810              | Forward | TGCGGCCGGAACAAAG                    |
| <i>MGD3</i>            | Reverse | CCTTGACCGGAATCTTCCATT               |
| AT1G56600              | Forward | AATATAATCATCGAGCTCGT                |
| <i>GOLS2</i>           | Reverse | TTATAGTCATGAAGAGGCG                 |
| <b>RT-PCR</b>          |         |                                     |
| AT3G18780              | Forward | GTAGTCAACAGCAACAAAGGAGAGC           |
| <i>ACTIN2</i>          | Reverse | ATGGCTGAGGCTGATGATATTCA             |
| AT1G63010              | Forward | TTGTGAGTGCAAGTGCTCTTG               |
| <i>PHT5;1</i>          | Reverse | TACCCGCGATAACAACGATAG               |
| AT4G22990              | Forward | TCGTGTGATCCCCTTAGTGTC               |
| <i>PHT5;3</i>          | Reverse | TTTCCTTTCTCACCGTATCCC               |
| <b>CONFIRM T-DNA</b>   |         |                                     |
| SAIL_BP                | BP      | TAGCATCTGAATTTTCATAACCAATCTCGATACAC |
| SALK_BP                | BP      | TGGTTCACGTAGTGGGCCATCG              |
| <i>pht5;1-1</i>        | LP      | TTTTCACTTGAATGCACGAG                |
|                        | RP      | GAAATCTTTGAGAACATGGCG               |
| <i>pht5;1-2</i>        | LP      | TTGTGAGTGCAAGTGCTCTTG               |
|                        | RP      | TACCCGCGATAACAACGATAG               |
| <i>pht5;1-3</i>        | LP      | TACCCGCGATAACAACGATAG               |
|                        | RP      | TTGTGAGTGCAAGTGCTCTTG               |
| <i>pht5;2</i>          | LP      | GGTTTGTGGTGTGTTATCGG                |
|                        | RP      | GACGCTAACAGAATTTGCCTG               |
| <i>pht5;3</i>          | LP      | TCGTGTGATCCCCTTAGTGTC               |
|                        | RP      | TTTCCTTTCTCACCGTATCCC               |
| <b>CONSTRUCTS</b>      |         |                                     |
| <i>pPHT5;1:GUS</i>     | Forward | CTTTTAATCGCAGAAAGCAGAGAGC           |
|                        | Reverse | CTGTTCTTTACCTTGTTTATATCCGTCT        |
| <i>pPHT5;2:GUS</i>     | Forward | CTTCTACACTGAAAGAAAGTCACAGAG         |
|                        | Reverse | GGAGATGGATATGAGCAGATAGCTAATC        |
| <i>pPHT5;3:GUS</i>     | Forward | AGAAACGAATCACGTGGCTTTGTTTTT         |
|                        | Reverse | TTTCTACAACAAAACAAGAATCAGAGAC        |
| <i>p35S:PHT5;1-GFP</i> | Forward | ATGGTGGCTTTTGGGAAATACTTGCAGC        |
|                        | Reverse | ATAGAGTGAGTTATAAGTACAACAAGTAGC      |
| <i>p35S:PHT5;2-GFP</i> | Forward | ATGGTCGCCTTTGGAAAAAAGCTCAAGG        |
|                        | Reverse | ATACAAGGAGTTATAAGTATAACAAGTAGC      |

| Gene                       |         | Sequences (5'→3')                                   |
|----------------------------|---------|-----------------------------------------------------|
| <i>p35S:PHT5;2-HA</i>      | Forward | ATGGTCGCCTTTGGAAAAAAGCTCAAGG                        |
|                            | Reverse | TTAAGCGTAATCTGGAACATCGTATGGGTAATACAA<br>GGAGTTATAAG |
| <i>p35S:PHT5;3-GFP</i>     | Forward | ATGGTAGCCTTCGGGAAAAAACTCAAGG                        |
|                            | Reverse | ATACAAGGAGTTATAAGTAAAACAAG                          |
| <i>pPHT5;1:PHT5;1-GFP</i>  | Forward | CTTTTAATCGCAGAAAGCAGAGAGC                           |
|                            | Reverse | TCAATAGAGTGAGTTATAAGTACAAC                          |
| <i>p35S:GFP-OsSPX-MFS1</i> | Forward | ATGGTTAATTTTGGAAAGAAGTTG                            |
|                            | Reverse | TTAGTACAGGGTGTGTATGTG                               |
| <i>OsSPX-MFS1-ECFP</i>     | Forward | ATGGTTAATTTTGGAAAGAAGTTG                            |
|                            | Reverse | GTACAGGGTGTGTATGTGCAG                               |
